# Supplementary material for: Quantification of the Influence of Citrate/Fe(II) Molar Ratio on Hydroxyl Radical Production and Pollutant Degradation during Fe(II)-Catalyzed O2 and H2O2 Oxidation Processes
Source: MDPI journal article supplement (doi:10.3390/ijerph191912977), 2022-10-10
Supplement: s1 [file s1]

## Supporting Information for

Quantification of the influence of citrate/Fe(II) molar ratio on hydroxyl radical production and pollutant degradation during Fe(II)-catalyzed O<sub>2</sub> and H<sub>2</sub>O<sub>2</sub> oxidation processes

Bingbing Hu <sup>a</sup>, Peng Zhang <sup>a, b, \*</sup>, Hui Liu <sup>b</sup>, Songhu Yuan <sup>a, b</sup>

<sup>a</sup> State Key Laboratory of Biogeology and Environmental Geology, China University of Geosciences, 68 Jincheng Street, East Lake High-Tech Development Zone, Wuhan, Hubei, 430078, P. R. China

<sup>b</sup> Hubei Key Laboratory of Yangtze Catchment Environmental Aquatic Science, School of Environmental Studies, China University of Geosciences, 68 Jincheng Street, East Lake High-Tech Development Zone, Wuhan, Hubei, 430078, P. R. China

---

\*E-mail: zhangpeng@cug.edu.cn (P. Zhang);

**10 Pages, 3 Text, 4 Figures**

**Section S1:** Descriptions of reactions and associated rate constants for kinetic modeling

In Table 1 in the main text, reactions A1–A4 describe the oxidation of inorganic  $\text{Fe(II)}_{\text{dis}}$  by  $\text{O}_2$ ,  $\bullet\text{O}_2^-$ ,  $\text{H}_2\text{O}_2$  and  $\bullet\text{OH}$ , reaction A5 describes the reduction of inorganic  $\text{Fe(III)}_{\text{dis}}$  by  $\bullet\text{O}_2^-$ , reactions A6–A7 describe the hydrolysis and precipitate of inorganic  $\text{Fe(III)}_{\text{dis}}$ , reactions A8–A9 describe the absorption and desorption of inorganic  $\text{Fe(II)}_{\text{dis}}$  on lepidocrocite surface, reactions A10–A13 describe the oxidation of  $\text{Fe(II)}_{\text{ad}}$  by  $\text{O}_2$ ,  $\bullet\text{O}_2^-$ ,  $\text{H}_2\text{O}_2$  and  $\bullet\text{OH}$ , reaction A14 describes the decomposition of  $\text{H}_2\text{O}_2$  by lepidocrocite and reaction A15 describes the reduction of lepidocrocite by  $\bullet\text{O}_2^-$ . Reaction B1 describes the reaction between benzoate and  $\bullet\text{OH}$ . Reactions C1–C4 describe the complexation of inorganic  $\text{Fe(II)}_{\text{dis}}$  and  $\text{Fe(III)}_{\text{dis}}$  by citrate, reaction C5–C8 describe the oxidation of citrate complexed  $\text{Fe(II)}$  by  $\text{O}_2$ ,  $\bullet\text{O}_2^-$ ,  $\text{H}_2\text{O}_2$  and  $\bullet\text{OH}$ , reaction C9 describes the decomposition of  $\text{H}_2\text{O}_2$  by citrate complexed  $\text{Fe(III)}$ , reaction C10 describes the reduction of citrate complexed  $\text{Fe(III)}$  by  $\bullet\text{O}_2^-$ , and reactions C11–C12 describe the oxidation of citrate complexed  $\text{Fe(III)}$  and uncomplexed citrate by  $\bullet\text{OH}$ .

In the kinetic modeling, the rate constants for the oxidation of inorganic  $\text{Fe(II)}_{\text{dis}}$ ,  $\text{Fe(II)}_{\text{ad}}$ , complexed  $\text{Fe(II)}$  by  $\text{O}_2$  and the oxidation of complexed  $\text{Fe(II)}$  by  $\text{H}_2\text{O}_2$  were obtained likewise by Kintecus V5.50 through best fitting the measured concentrations of  $\text{Fe(II)}_{\text{dis}}$ ,  $\text{Fe(III)}_{\text{dis}}$  and  $\bullet\text{OH}$  (Figs. 1, 3 and S1). Other rate constants were referred to literature. As shown in Table 1, the rate constant of inorganic  $\text{Fe(II)}_{\text{dis}}$  oxidation by

O<sub>2</sub> was much lower than that of Fe(II)<sub>ad</sub> and citrate complexed Fe(II) oxidation by O<sub>2</sub>, which was ascribed to the high reactivity of Fe(II)<sub>ad</sub> and citrate complexed Fe(II) [1,2]. The rate constant of citrate complexed Fe(II) oxidation by H<sub>2</sub>O<sub>2</sub> was lower than that of inorganic Fe(II)<sub>dis</sub> oxidation by H<sub>2</sub>O<sub>2</sub>, which was consistent with the previous observation that the rate of H<sub>2</sub>O<sub>2</sub> decomposition by citrate complexed Fe(II) decreased with increasing citrate/Fe molar ratio [3].

In the absence of citrate, H<sub>2</sub>O<sub>2</sub> reacted completely with inorganic Fe(II)<sub>dis</sub>, so the •OH yield from H<sub>2</sub>O<sub>2</sub> decomposition by inorganic Fe(II)<sub>dis</sub> can be set as 2.1%, 1.8% and 0.7% for pH 6, 7 and 7.5, respectively. Because the fraction of citrate complexed Fe(II) in total Fe(II)<sub>dis</sub> was higher than 99% at pH 6–7.5 when the citrate concentration reached 500 μM (i.e., citrate/Fe(II) was 2, Fig. S4), H<sub>2</sub>O<sub>2</sub> will be almost completely decomposed by citrate complexed Fe(II). For the sake of simplicity, we assumed that the •OH yields from H<sub>2</sub>O<sub>2</sub> decomposition by citrate complexed Fe(II) were equal to the experimental measurements when citrate/Fe(II) molar ratio was 2. Thus, the •OH yield from H<sub>2</sub>O<sub>2</sub> decomposition by citrate complexed Fe(II) can be roughly set to be 52.2%, 31.5% and 17.6% for pH 6, 7 and 7.5, respectively.

## **Section S2** Influence of citrate/Fe(II) molar ratio on •OH production from H<sub>2</sub>O<sub>2</sub> decomposition

To further get insight into the role of citrate/Fe(II) molar ratio on •OH production, we estimated the competitive effect of inorganic Fe(II)<sub>dis</sub> and citrate complexed Fe(II)

on  $\text{H}_2\text{O}_2$  decomposition to generate  $\bullet\text{OH}$ . In  $\text{Fe(II)}$ -citrate system, the relative contribution ( $R$ ) of inorganic  $\text{Fe(II)}_{\text{dis}}$  and citrate complexed  $\text{Fe(II)}$  to  $\text{H}_2\text{O}_2$  decomposition can be calculated by Eq. (S1).

$$R = \frac{C_{\text{Fe(II)}_i} k_{\text{H}_2\text{O}_2, \text{Fe(II)}_i}}{C_{\text{Fe(II)}_{\text{inorganic}}} k_{\text{H}_2\text{O}_2, \text{Fe(II)}_{\text{inorganic}}} + C_{\text{Fe(II)}_{\text{complexed}}} k_{\text{H}_2\text{O}_2, \text{Fe(II)}_{\text{complexed}}}} \quad (\text{S1})$$

where  $C_{\text{Fe(II)}_i}$  is the concentration of inorganic  $\text{Fe(II)}_{\text{dis}}$  or citrate complexed  $\text{Fe(II)}$  and  $k_{\text{H}_2\text{O}_2, \text{Fe(II)}_i}$  was the reaction rate constant of the inorganic  $\text{Fe(II)}_{\text{dis}}$  or citrate complexed  $\text{Fe(II)}$  with  $\text{H}_2\text{O}_2$ .

When the concentration of  $\text{H}_2\text{O}_2$  was lower than that of  $\text{Fe(II)}$ , the yield of  $\bullet\text{OH}$  ( $\varphi$ ) from  $\text{H}_2\text{O}_2$  decomposition in  $\text{Fe(II)}$ -citrate system can be calculated by Eq. (S2),

$$\varphi = \varphi_{\text{Fe(II)}_{\text{inorganic}}} R_{\text{Fe(II)}_{\text{inorganic}}} + \varphi_{\text{Fe(II)}_{\text{complexed}}} R_{\text{Fe(II)}_{\text{complexed}}} \quad (\text{S2})$$

where  $\varphi_{\text{Fe(II)}_{\text{inorganic}}}$  and  $\varphi_{\text{Fe(II)}_{\text{complexed}}}$  were the  $\bullet\text{OH}$  yield from  $\text{H}_2\text{O}_2$  decomposition by inorganic  $\text{Fe(II)}_{\text{dis}}$  and citrate complexed  $\text{Fe(II)}$  (e.g.,  $\text{Fe(II)}$ -citrate<sup>-</sup>), respectively;  $R_{\text{Fe(II)}_{\text{inorganic}}}$  and  $R_{\text{Fe(II)}_{\text{complexed}}}$  were the relative contribution of inorganic  $\text{Fe(II)}_{\text{dis}}$  and citrate complexed  $\text{Fe(II)}$  to decompose  $\text{H}_2\text{O}_2$ , respectively.

Combining Eqs. (S1)–(S2) gives

$$\begin{aligned} \varphi = & \varphi_{\text{Fe(II)}_{\text{inorganic}}} \frac{C_{\text{Fe(II)}_{\text{inorganic}}} k_{\text{H}_2\text{O}_2, \text{Fe(II)}_{\text{inorganic}}}}{C_{\text{Fe(II)}_{\text{inorganic}}} k_{\text{H}_2\text{O}_2, \text{Fe(II)}_{\text{inorganic}}} + C_{\text{Fe(II)}_{\text{complexed}}} k_{\text{H}_2\text{O}_2, \text{Fe(II)}_{\text{complexed}}}} \\ & + \varphi_{\text{Fe(II)}_{\text{complexed}}} \frac{C_{\text{Fe(II)}_{\text{complexed}}} k_{\text{H}_2\text{O}_2, \text{Fe(II)}_{\text{complexed}}}}{C_{\text{Fe(II)}_{\text{inorganic}}} k_{\text{H}_2\text{O}_2, \text{Fe(II)}_{\text{inorganic}}} + C_{\text{Fe(II)}_{\text{complexed}}} k_{\text{H}_2\text{O}_2, \text{Fe(II)}_{\text{complexed}}}} \end{aligned} \quad (\text{S3})$$

In Eq. (S3), the concentrations of inorganic  $\text{Fe(II)}_{\text{dis}}$  and complexed  $\text{Fe(II)}$  can be obtained from speciation calculation (Fig. S4), the reaction rate constants of inorganic and citrate complexed  $\text{Fe(II)}$  with  $\text{H}_2\text{O}_2$  were given in Table 1, and the values of

$\phi_{\text{Fe(II)}_{\text{inorganic}}}$  and  $\phi_{\text{Fe(II)}_{\text{complexed}}}$  were given in Table 2.

### Section S3 Influence of citrate on Fe(II) oxidation and Fe(III)<sub>dis</sub> precipitate

Previous studies have shown that Fe(II) oxidation and Fe(III) precipitate in the inorganic Fe(II)<sub>dis</sub> system can be described as the following processes [4,5]: inorganic Fe(II)<sub>dis</sub> was first oxidized by O<sub>2</sub> to generate inorganic Fe(III)<sub>dis</sub>, and then inorganic Fe(III)<sub>dis</sub> was hydrolyzed to Fe(III) precipitates. The resulting Fe(III) precipitates may adsorb Fe(II)<sub>dis</sub> forming adsorbed Fe(II) (Fe(II)<sub>ad</sub>). Because Fe(II)<sub>ad</sub> toward O<sub>2</sub> was more reactive than inorganic Fe(II)<sub>dis</sub>, the formation of Fe(III) precipitates can significantly accelerate inorganic Fe(II)<sub>dis</sub> oxidation [6,7]. At pH 6, no Fe(III) precipitates were generated in the inorganic Fe(II)<sub>dis</sub> system, so the oxidation of Fe(II)<sub>dis</sub> controlled the total rate of Fe(II) oxidation (Fig. S1).

In the presence of citrate, the complexation of citrate resulted in the formation of Fe(II)-citrate<sup>-</sup> and Fe(III)-citrate and the fractions of these complexed Fe species increased with increasing citrate/Fe molar ratio (Fig. S4). Because Fecitrate<sup>-</sup> toward O<sub>2</sub> was more reactive than Fe<sup>2+</sup> [8], the presence of citrate accelerated Fe(II)<sub>dis</sub> oxidation at pH 6 and the rate of Fe(II)<sub>dis</sub> oxidation increased with increasing citrate concentration (Fig. 3). At pH 7 and 7.5, abundant Fe(III) precipitates produced in the inorganic Fe(II)<sub>dis</sub> system (Fig. S1), so the oxidation of Fe(II)<sub>ad</sub> contributed mainly to Fe(II) oxidation. However, the addition of citrate impeded the formation of Fe(III) precipitates in Fe(II)-citrate system (Fig. 3e–f), thus inhibiting Fe(II)<sub>ad</sub> generation. At

pH 7 and 7.5, the negative effect due to inhibiting Fe(III) precipitates outcompeted the acceleration effect of citrate complexed Fe(II) formation, thus inhibiting Fe(II) oxidation (Fig. 3b–c). For Fe(III) precipitates, in the absence of citrate, the resulting  $\text{Fe}^{3+}$  can be first hydrolyzed to dissolved Fe(III) oxyhydroxides (e.g.,  $\text{Fe}(\text{OH})_2^+$  and  $\text{Fe}(\text{OH})_{3(\text{aq})}$ ) (Fig. S4), which then interacted with one another to form Fe(III) precipitates [9]. However, in the presence of citrate, the complexation of citrate resulted in the formation of Fe(III)-citrate<sup>0</sup> complex (Fig. S4). In addition, a previous study reported that the presence of citrate prevented the crystallization of inorganic Fe(III)<sub>dis</sub> when citrate/Fe molar ratio was higher than 0.1 [10]. In this study, the molar ratio of citrate to Fe reached 0.25–2, which was higher than the threshold value. These two causes may jointly inhibit the formation of Fe(III) precipitates at pH 7 and 7.5.

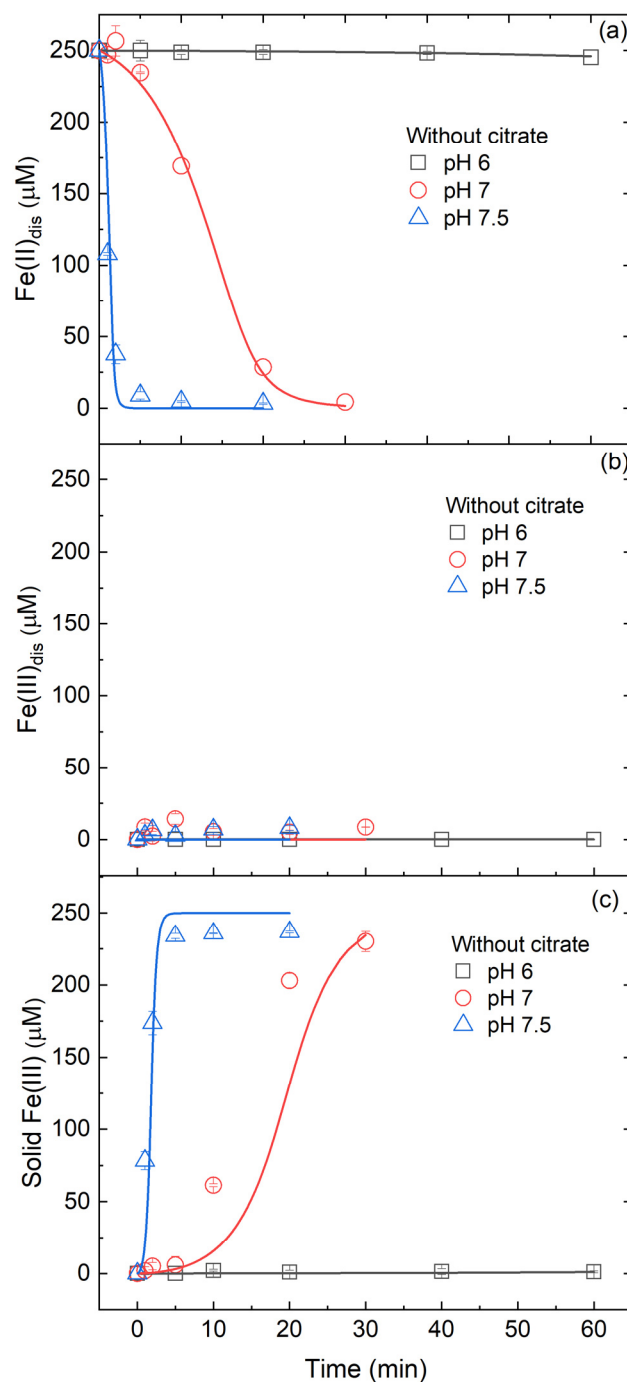

**Figure S1.** Effects of solution pH on (a) inorganic  $\text{Fe(II)}_{\text{dis}}$ , (b) inorganic  $\text{Fe(III)}_{\text{dis}}$  and (c) solid  $\text{Fe(III)}$  production during oxidation. Initial conditions: 250  $\mu\text{M}$   $\text{Fe(II)}_{\text{dis}}$ , 20 mM benzoate and 10 mM buffer under oxic conditions. In panel (c), the concentration of solid  $\text{Fe(III)}$  was calculated using the difference between  $\text{Fe}_{\text{total}}$  and inorganic  $\text{Fe(III)}_{\text{dis}}$  concentrations. Points are the experimental results and lines are the modelled

curves.

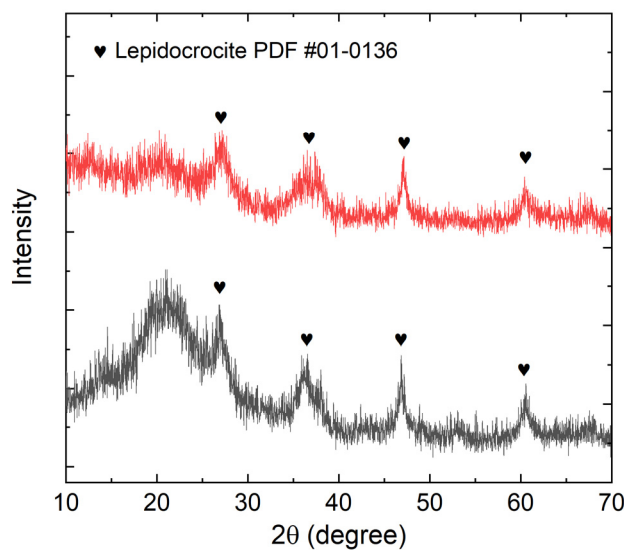

**Figure S2.** XRD patterns of Fe(III) precipitates. The main mineral compositions were detected by a D8-FOCUS X-ray diffractometer with Cu K radiation (Bruker AXS., Germany). The measurement was performed at 40 kV and 40 mA at the scanning step size of  $0.01^\circ$  and step time of 0.05 s.

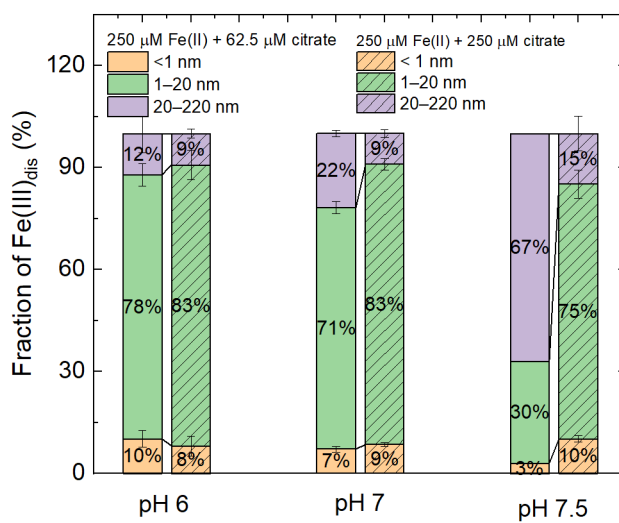

**Figure S3.** Percentage of Fe(III) concentration in different size fractions as a function



of solution pH and citrate dosage. The percentage of the y-axis means the concentration of Fe(III) in a certain size fraction to the total concentration of Fe(III) in the suspensions.

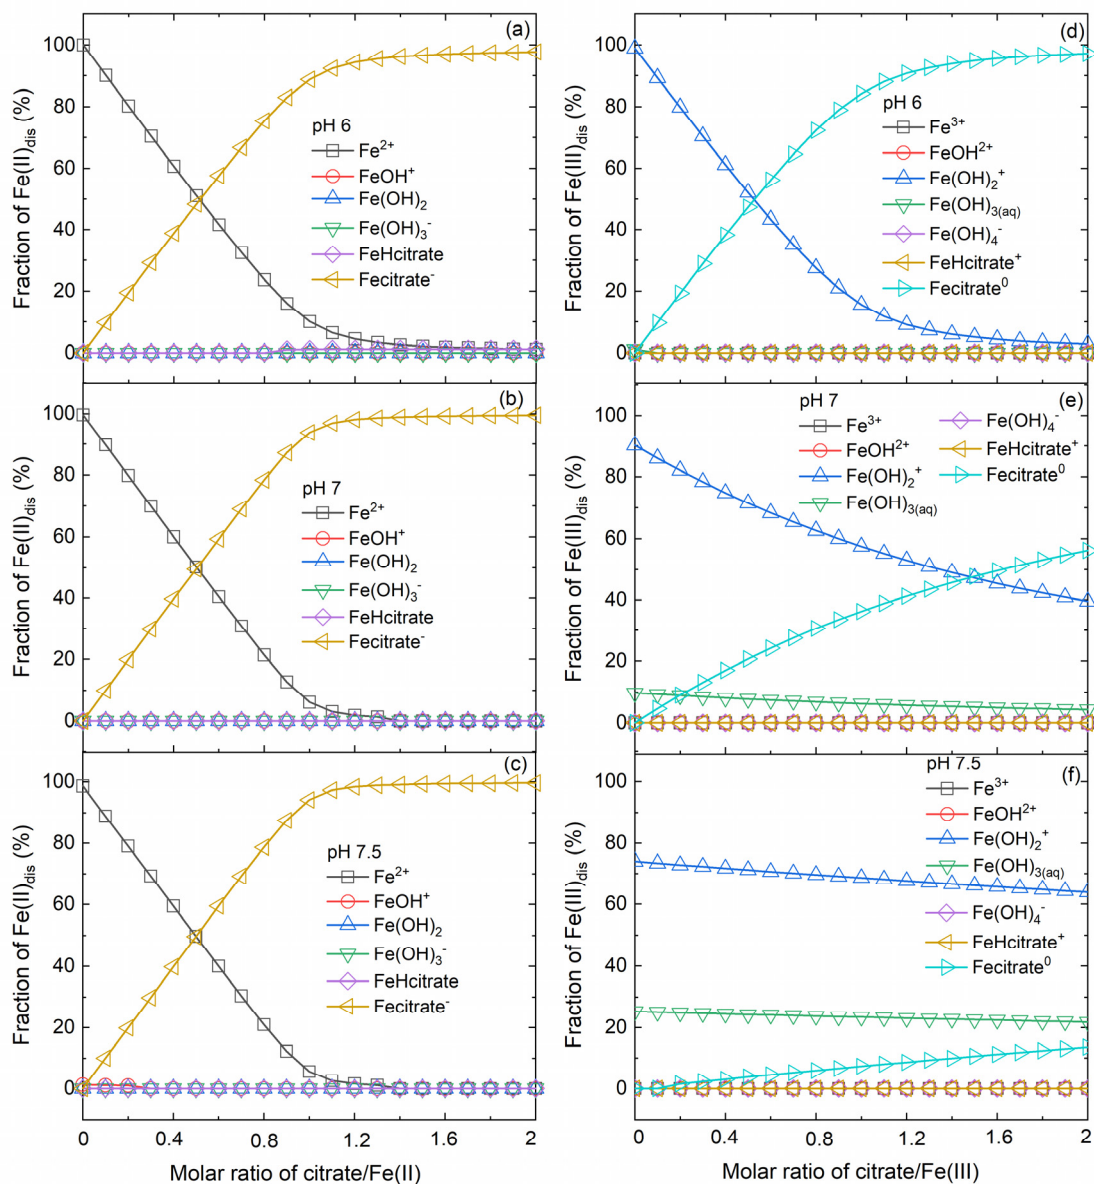

**Figure S4.** (a–c) Fe(II) and (d–f) Fe(III) species speciation distribution as a function of the molar ratio of citrate to Fe(II)/Fe(III). Initial conditions: variable solution pH and citrate concentration specified in panels (a–f) and 250  $\mu\text{M}$  Fe(II)<sub>dis</sub>/Fe(III)<sub>dis</sub>.

Calculations were performed by Visual MINTEQ 3.1 [11]. The solid phase was not considered in both calculations.

## References

1. Remucal, C.K.; Sedlak, D.L. The role of iron coordination in the production of reactive oxidants from ferrous iron oxidation by oxygen and hydrogen peroxide. In *Aquatic redox chemistry*; ACS Publications: 2011; pp. 177–197.
2. Jones, A.M.; Griffin, P.J.; Collins, R.N.; Waite, T.D. Ferrous iron oxidation under acidic conditions—The effect of ferric oxide surfaces. *Geochim. Cosmochim. Acta* **2014**, *145*, 1–12.
3. Lewis, S.; Lynch, A.; Bachas, L.; Hampson, S.; Ormsbee, L.; Bhattacharyya, D. Chelate-modified Fenton reaction for the degradation of trichloroethylene in aqueous and two-phase systems. *Environ. Eng. Sci.* **2009**, *26*, 849–859.
4. King, D.W.; Lounsbury, H.A.; Millero, F.J. Rates and mechanism of Fe(II) oxidation at nanomolar total iron concentrations. *Environ. Sci. Technol.* **1995**, *29*, 818–824.
5. Rose, A.L.; Waite, T.D. Kinetic model for Fe(II) oxidation in seawater in the absence and presence of natural organic matter. *Environ. Sci. Technol.* **2002**, *36*, 433–444.
6. Tamura, H.; Kawamura, S.; Hagayama, M. Acceleration of the oxidation of Fe<sup>2+</sup> ions by Fe(III)-oxyhydroxides. *Corrosion Sci.* **1980**, *20*, 963–971.
7. Qian, A.; Yuan, S.; Xie, S.; Tong, M.; Zhang, P.; Zheng, Y. Oxidizing capacity of iron electrocoagulation systems for refractory organic contaminant transformation. *Environ. Sci. Technol.* **2019**, *53*, 12629–12638, doi:10.1021/acs.est.9b03754.
8. Zhang, P.; Van Cappellen, P.; Pi, K.; Yuan, S. Effects of riboflavin and desferrioxamine B on Fe(II) oxidation by O<sub>2</sub>. *Fundamental Research* **2022**, *2*, 208–217, doi:https://doi.org/10.1016/j.fmre.2021.09.012.
9. Pham, A.N.; Rose, A.L.; Feitz, A.J.; Waite, T.D. Kinetics of Fe(III) precipitation in aqueous solutions at pH 6.0–9.5 and 25°C. *Geochim. Cosmochim. Acta* **2006**, *70*, 640–650, doi:10.1016/j.gca.2005.10.018.
10. Krishnamurti, G.; Huang, P. Influence of citrate on the kinetics of Fe(II) oxidation and the formation of iron oxyhydroxides. *Clay Clay Min.* **1991**, *39*, 28–34.
11. Gustafsson, J. Visual MINTEQ, Version 3.1 Division of land and water resources. *Royal Institute of Technology, Stockholm, Sweden* **2013**.
